# Supplementary material for: Mechanical and structural comparison between primary tumor and lymph node metastasis cells in colorectal cancer
Source: Royal Society of Chemistry journal article supplement (doi:10.1039/c5sm01089f), 2015-01-01
Supplement: c5sm01089f1.pdf [file c5sm01089f1.pdf]

Supplementary material

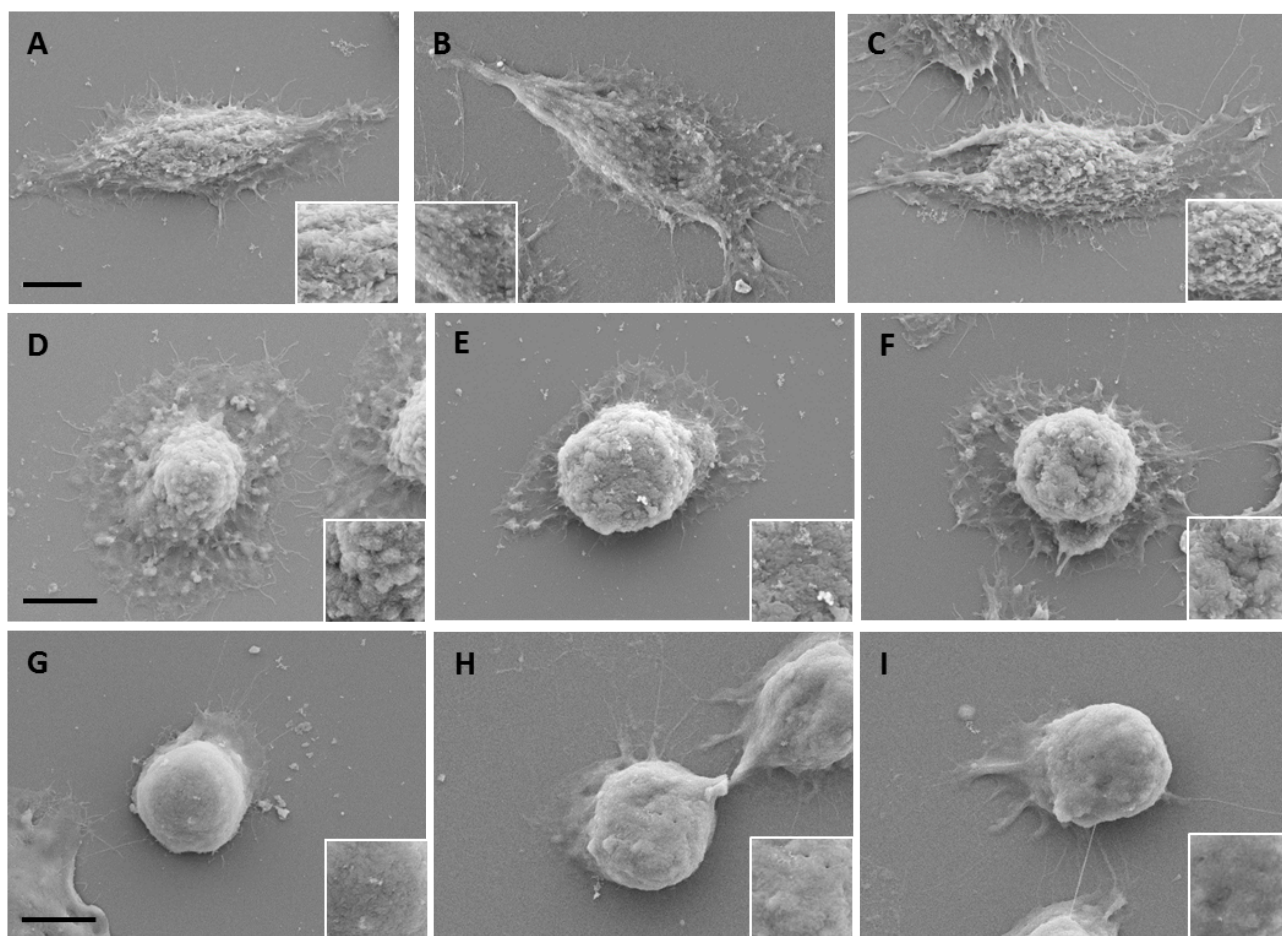

**Fig.1S** Representative SEM images of SW480-E (A, B, C), SW480-R (D, E, F) and SW620 (G, H, I). In the insets, the surface roughness of each cell is displayed. Scale bar is 10  $\mu\text{m}$ .

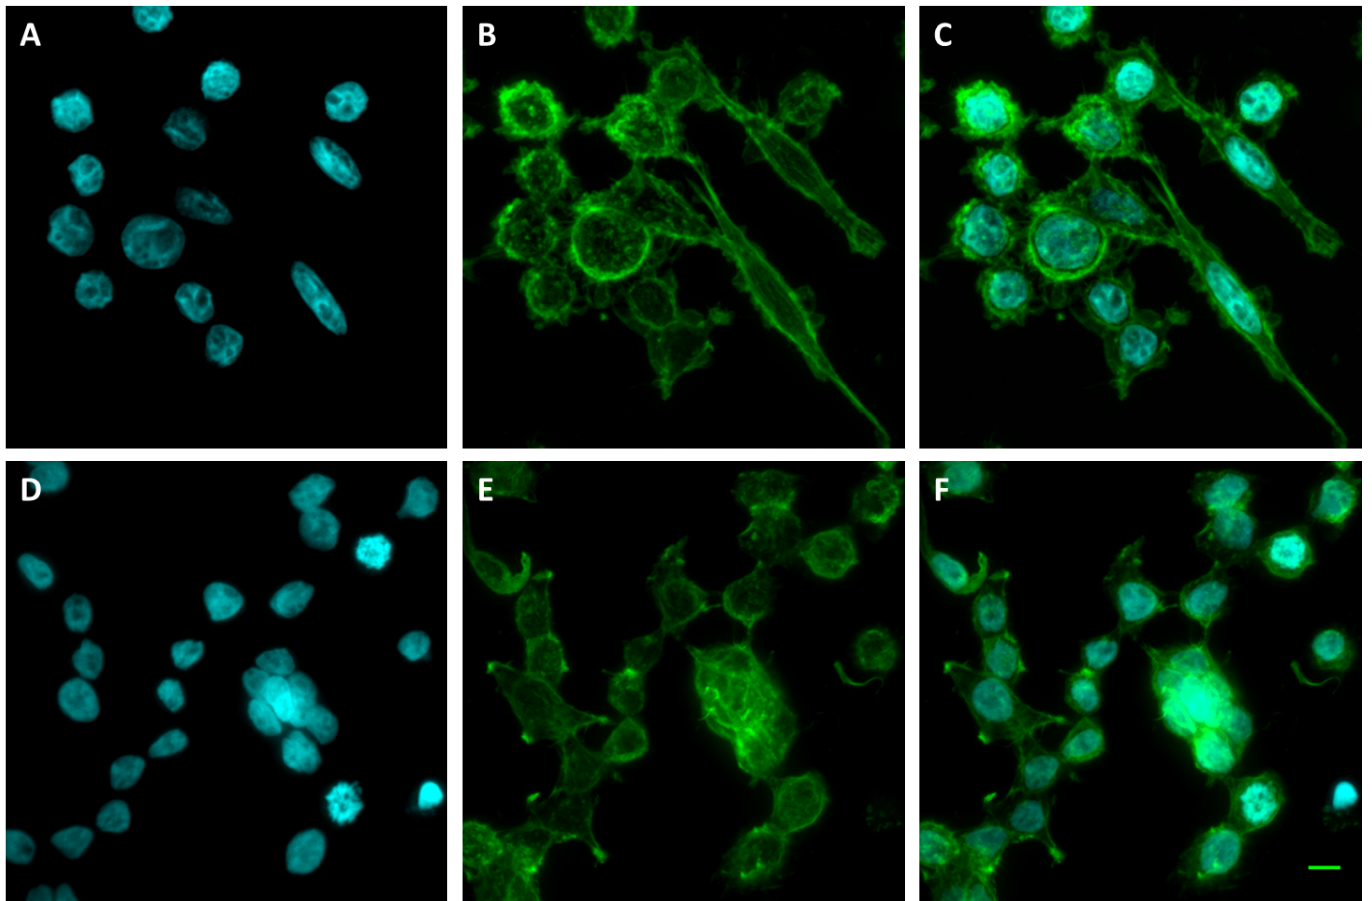

**Fig.2S** Representative confocal images of SW480 (A, B, C) and SW620 (D, E, F). SW480 have different shapes in culture with mixed elongated and round cells, while SW620 are smaller, round and prefer to grow in small aggregates. Actin cytoskeleton labelled with Phalloidin is shown in green (A, D) while cell nuclei are labelled in DAPI (B, E). Merge images of the two channels are also reported (C, F). Scale bar is 10  $\mu\text{m}$ .
